# Supplementary material
Source: PubMed Central journal article supplement (PMC4546841)

## A. DHFR antisense

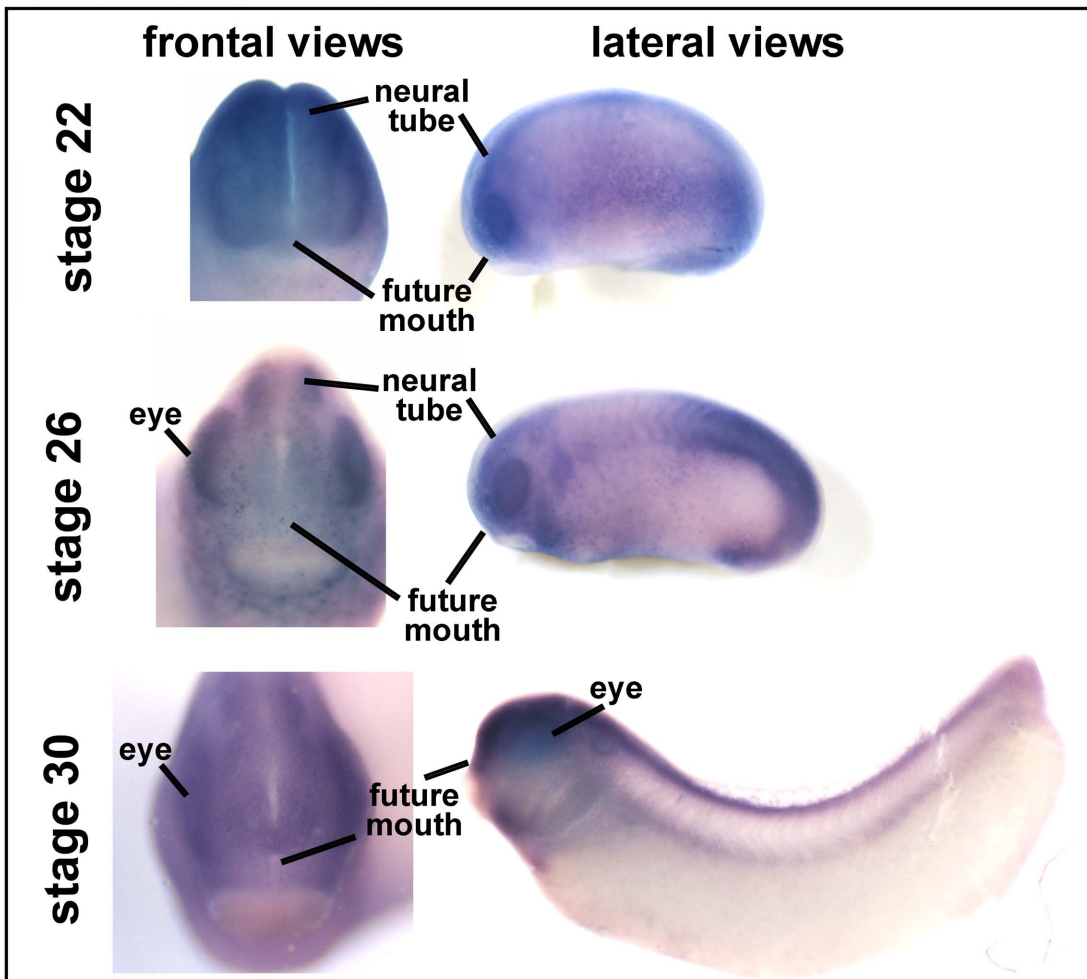

## B. DHFR sense

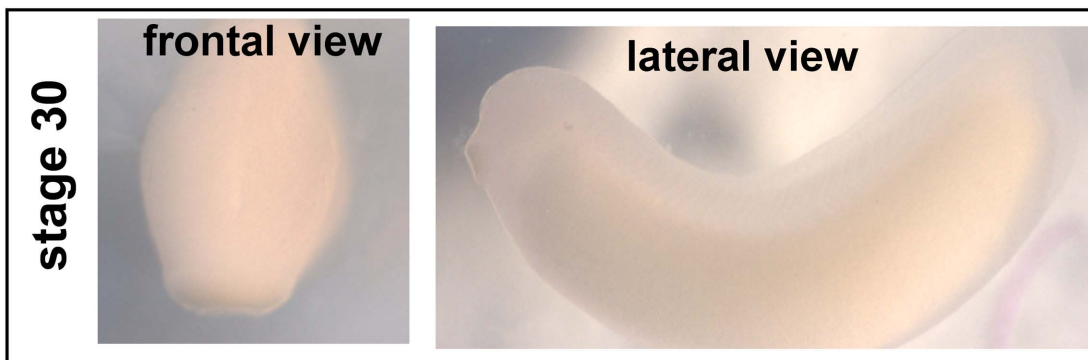

## C. Reduced folate carrier

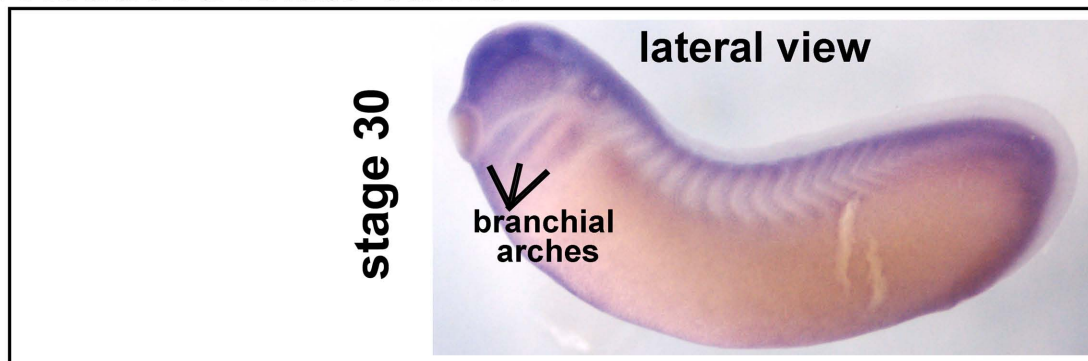

| Target  | Sequence                                    |
|---------|---------------------------------------------|
| DHFR MO | 5' AGAATGTGAACTGCACTGACCTTCA 3' Fluorescein |

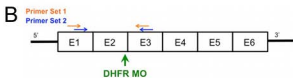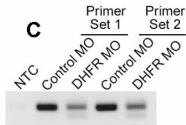

## D DHFR protein sequence comparisons

| Species                   | % Identity |
|---------------------------|------------|
| <i>Mus Musculus</i>       | 90         |
| <i>Rattus Norvegicus</i>  | 90         |
| <i>Gallus Gallus</i>      | 75         |
| <i>Xenopus Laevis</i>     | 65         |
| <i>Xenopus Tropicalis</i> | 65         |
| <i>Danio rerio</i>        | 62         |

| Species                   | % Identity     |               |
|---------------------------|----------------|---------------|
|                           | Folate Binding | NADP+ Binding |
| <i>Mus Musculus</i>       | 83             | 90            |
| <i>Rattus Norvegicus</i>  | 83             | 90            |
| <i>Gallus Gallus</i>      | 67             | 80            |
| <i>Xenopus Laevis</i>     | 50             | 50            |
| <i>Xenopus Tropicalis</i> | 50             | 50            |
| <i>Danio Rerio</i>        | 50             | 50            |

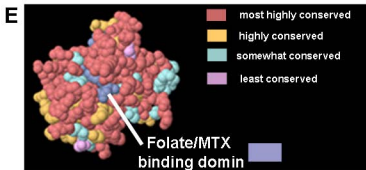

## A. DHFR Morphants

heart

gut

length

CMO

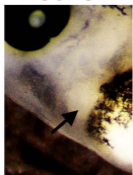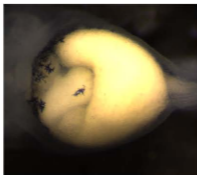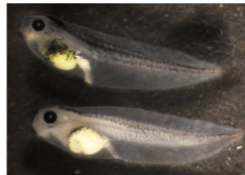

DHFR MO

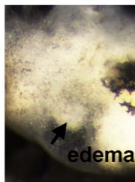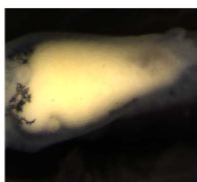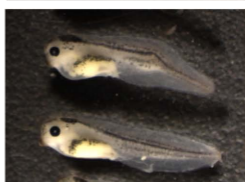

## B. MTX treated

DMSO

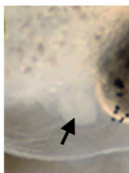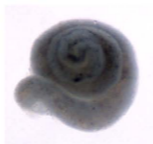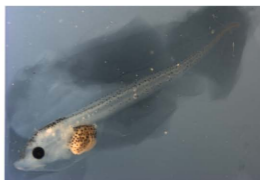

MTX

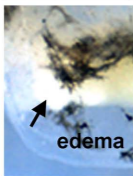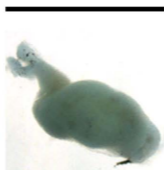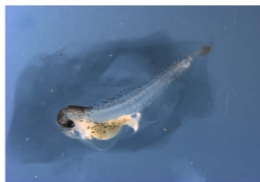

**Normal**

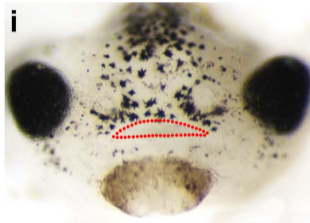

**Mild**

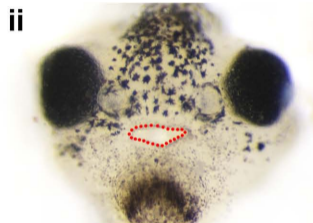

**Moderate**

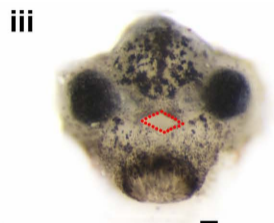

**Severe**

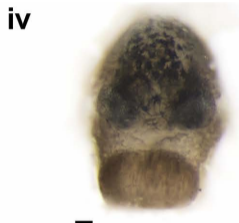

**25%**

**75%**

# Global DNA Methylation

Uncut      HpaII cut      MspI cut  
C      M      C      M      C      M

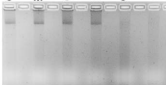

## Quantification

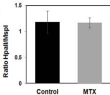

# A stage 31/32

| Sample    | sub G1 | G1/G0 | S    | G2/M |
|-----------|--------|-------|------|------|
| Control 1 | 6.4    | 51.4  | 29.1 | 12.3 |
| Control 2 | 6.4    | 51.4  | 29.4 | 12.2 |
| Control 3 | 18.5   | 36.4  | 33.8 | 10.8 |
| Control 4 | 17.7   | 34.8  | 34.6 | 12.3 |
| MTX 1     | 8.9    | 49.7  | 28.7 | 12.2 |
| MTX 2     | 9.6    | 48.7  | 28.7 | 12.1 |
| MTX 3     | 23     | 32.1  | 35.3 | 9.3  |
| MTX 4     | 22.2   | 35.9  | 32.3 | 9.4  |

# stage 35

| Sample    | sub G1 | G1/G0 | S    | G2/M |
|-----------|--------|-------|------|------|
| Control 1 | 13.9   | 39.3  | 24.2 | 10.1 |
| Control 2 | 18.2   | 43    | 22.6 | 9.8  |
| Control 3 | 13     | 47    | 27.2 | 10.9 |
| Control 4 | 10.8   | 49.6  | 25.6 | 12.5 |
| MTX 1     | 24.4   | 36.8  | 26   | 6.6  |
| MTX 2     | 25.9   | 30    | 33.9 | 5.3  |
| MTX 3     | 25.1   | 42.2  | 22.9 | 8.6  |
| MTX 4     | 18     | 46.9  | 25.7 | 8.1  |

# B Representative Cell Cycle Profiles st.31/32

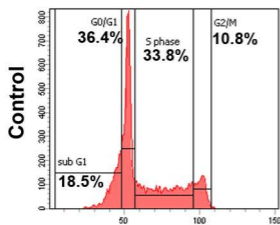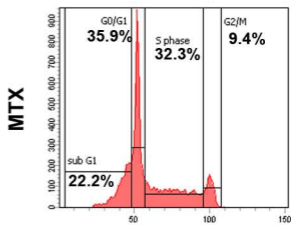

# C PCNA Western blot

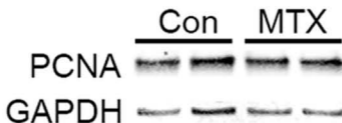

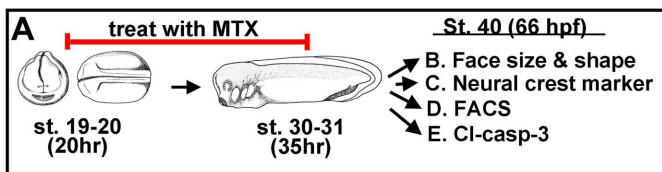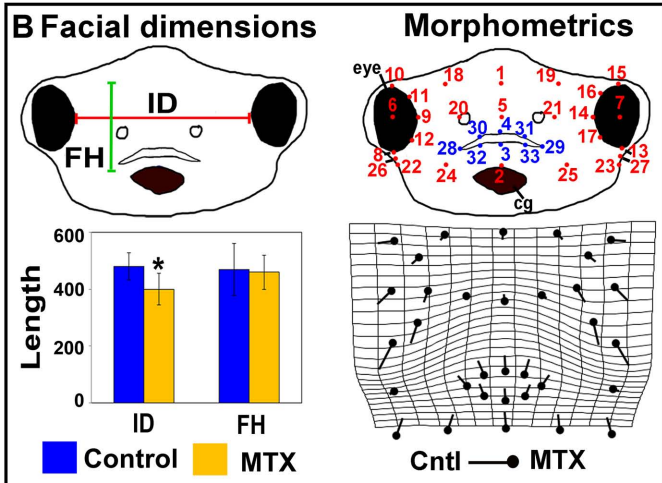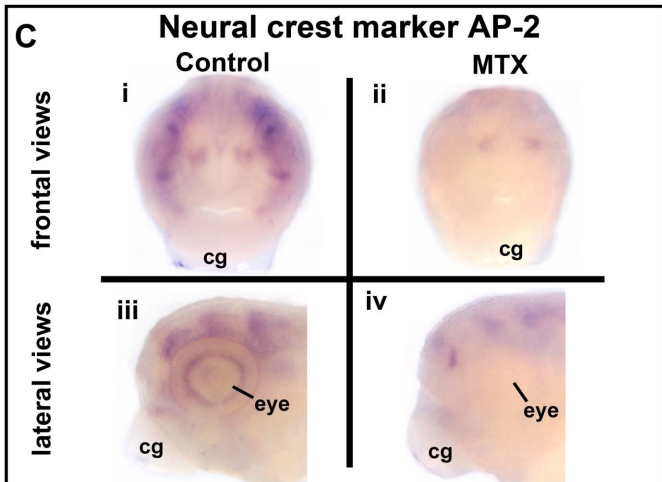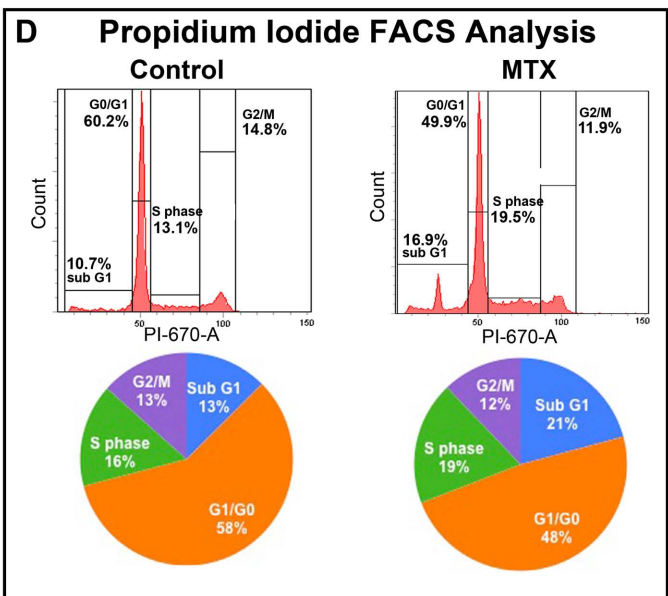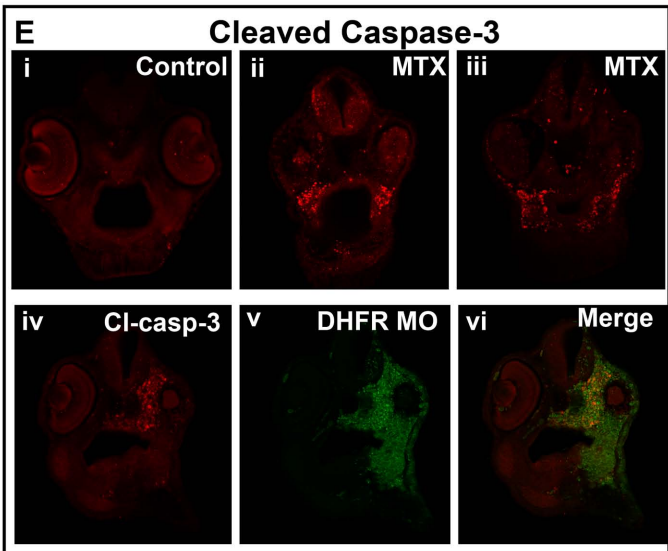

**H3K4me3**

**DHFR MO FITC**

**Merge**

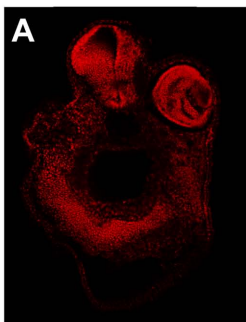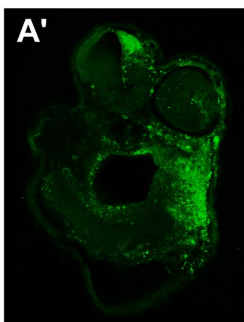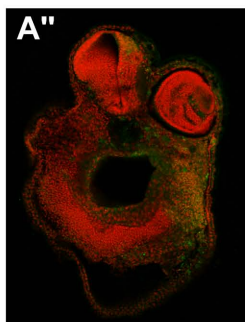

**ph3**

**DHFR MO FITC**

**Merge**

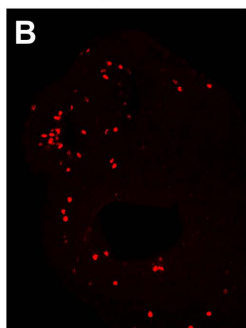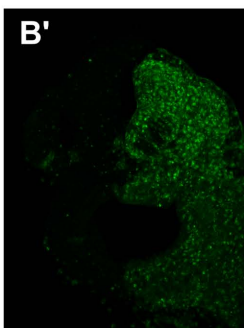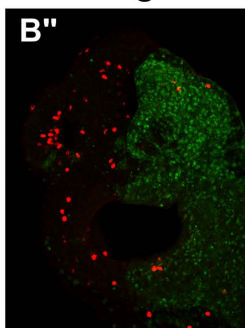

**cl-casp.3**

**DHFR MO FITC**

**Merge**

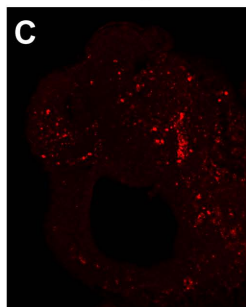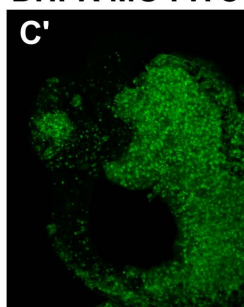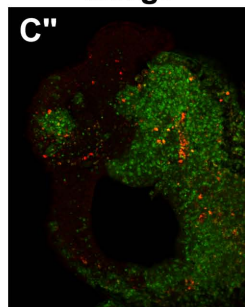

**cl-casp.3**

**Cont MO FITC**

**Merge**

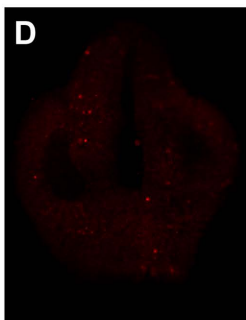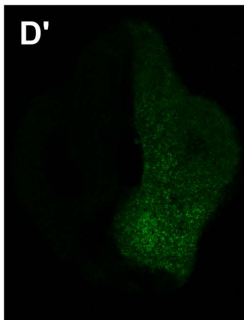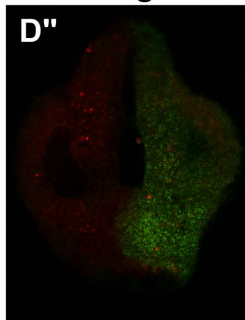

Supplement: NIHMS709173-supplement-2.pdf [file NIHMS709173-supplement-2.pdf]
